# Supplementary material for: In Vivo Cerebral Translocator Protein (TSPO) Binding and Its Relationship with Blood Adiponectin Levels in Treatment-Naïve Young Adults with Major Depression: A [11C]PK11195 PET Study
Source: MDPI journal article supplement (doi:10.3390/biomedicines10010034), 2021-12-24
Supplement: s1 [file s1]

## Supplementary Material (Table S1)

**Supplementary Table S1.** Correlation coefficients between [ $^{11}\text{C}$ ]PK11195 BP<sub>ND</sub> values and clinical scores in the MDD group ( $n = 30$ ).

| ROIs                | HAMD-17       | BDI            | BIS            | RSES           |
|---------------------|---------------|----------------|----------------|----------------|
| Lt. PFC             | 0.121 (0.524) | 0.143 (0.452)  | -0.050 (0.794) | -0.091 (0.634) |
| Rt. PFC             | 0.105 (0.582) | 0.137 (0.469)  | -0.020 (0.915) | -0.118 (0.535) |
| Lt. ACC             | 0.034 (0.858) | 0.085 (0.655)  | -0.032 (0.867) | -0.063 (0.741) |
| Rt. ACC             | 0.187 (0.323) | 0.107 (0.574)  | 0.074 (0.698)  | -0.202 (0.284) |
| Lt. PCC             | 0.234 (0.214) | 0.156 (0.409)  | 0.087 (0.648)  | -0.058 (0.760) |
| Rt. PCC             | 0.190 (0.314) | -0.051 (0.787) | 0.143 (0.451)  | -0.098 (0.605) |
| Lt. insula          | 0.086 (0.651) | 0.081 (0.669)  | 0.022 (0.908)  | -0.177 (0.350) |
| Rt. insula          | 0.071 (0.709) | 0.164 (0.387)  | 0.036 (0.851)  | -0.181 (0.338) |
| Lt. hippocampus     | 0.215 (0.254) | 0.193 (0.308)  | 0.036 (0.852)  | -0.020 (0.916) |
| Rt. hippocampus     | 0.159 (0.401) | 0.151 (0.426)  | 0.145 (0.444)  | 0.129 (0.498)  |
| Lt. temporal cortex | 0.168 (0.374) | 0.166 (0.380)  | 0.063 (0.741)  | -0.138 (0.467) |
| Rt. temporal cortex | 0.181 (0.339) | 0.172 (0.364)  | 0.058 (0.762)  | -0.092 (0.628) |

The numbers in parentheses indicate the  $p$ -values. BP<sub>ND</sub>, binding potential with respect to non-displaceable compartment; MDD, major depressive disorder; ROI, region of interest; HAMD-17, Hamilton Rating Scale for Depression; BDI, Beck Depression Inventory; BIS, Barratt Impulsiveness Scale; RSES, Rosenberg Self-Esteem Scale; Lt, Left; Rt, Right; PFC, prefrontal cortex; ACC, anterior cingulate cortex; PCC, posterior cingulate cortex.
